# Supplementary material for: Synthesis, structure and spectral and redox properties of new mixed ligand monomeric and dimeric Ru(ii) complexes: predominant formation of the “cis-α” diastereoisomer and unusual3MC emission by dimeric complexes
Source: Royal Society of Chemistry journal article supplement (doi:10.1039/b512382h), 2005-11-02
Supplement: b512382h.pdf [file b512382h.pdf]

**Table S1.**  $^1\text{H}$  and  $^{13}\text{C}$  NMR chemical shifts of free ligands and ruthenium(II) complexes in  $(\text{CD}_3)_2\text{SO}$

---

**$^1\text{H}$  NMR data**

**Free ligands** :  $\delta$  (multiplicity, integration, assignment)

**pdto** :  $\delta$  8.487 (d, 2H,  $\text{H}_a$ ), 7.209 (t, 2H,  $\text{H}_b$ ), 7.687 (t, 2H,  $\text{H}_c$ ), 7.301 (d, 2H,  $\text{H}_d$ ), 3.367 (t, 4H,  $\text{H}_e$ ), 2.974 (m, 4H,  $\text{H}_f$ ), 2.922 (t, 4H,  $\text{H}_g$ ).

**bbdo** :  $\delta$  7.472 (dd, 4H,  $\text{H}_a$  and  $\text{H}_d$ ), 7.115 (dd, 4H,  $\text{H}_b$  and  $\text{H}_c$ ), 3.086 (t, 4H,  $\text{H}_d$ ), 3.003 (t, 4H,  $\text{H}_f$ ), 2.749 (s, 4H,  $\text{H}_g$ ).

**bpy** :  $\delta$  8.500 (d, 2H,  $\text{H}_3$ ), 7.996 (t, 2H,  $\text{H}_4$ ), 7.497 (t, 2H,  $\text{H}_5$ ), 8.771 (d, 2H,  $\text{H}_6$ ).

**dpa** :  $\delta$  7.737 (d, 2H,  $\text{H}_3$ ), 7.636 (t, 2H,  $\text{H}_4$ ), 6.847 (t, 2H,  $\text{H}_5$ ), 8.213 (d, 2H,  $\text{H}_6$ ), 9.632 (s, 1H, NH).

**terpy** :  $\delta$  8.444 (d, 2H,  $\text{H}_3$ ), 8.008 (t, 2H,  $\text{H}_4$ ), 7.493 (t, 2H,  $\text{H}_5$ ), 8.725 (d, 2H,  $\text{H}_6$ ), 8.636 (d, 2H,  $\text{H}_3'$ ), 8.097 (t, 1H,  $\text{H}_4'$ ).

**Ruthenium(II) complexes** :  $\delta$  (multiplicity, integration, assignment, J/Hz, coordination-induced shifts: c.i.s.,  $\delta_{\text{complex}} - \delta_{\text{ligand}}$ )

**[Ru(pdto)Cl] $_2$ (ClO $_4$ ) $_2$  1** : Isomer **A**,  $\delta$  7.978 (d, 2H,  $\text{H}_a$ , 7.8, -0.509), 7.526 (t, 2H,  $\text{H}_b$ , 7.3, 0.317), 7.579 (t, 2H,  $\text{H}_c$ , 6.6, -0.108), 9.552 (d, 2H,  $\text{H}_d$ , 5.4, 2.251), 2.229 (t, 2H,  $\text{H}_e$ , 9.8, -1.138), 4.197 (t, 2H,  $\text{H}_e'$ , 13.9, 0.830), 3.282 (d, 2H,  $\text{H}_f$ , 5.9, 0.308), 3.413 (t, 2H,  $\text{H}_f'$ , 13.2, 0.439), 2.113 (t, 2H,  $\text{H}_g$ , 9.8, -0.809), 2.947 (t, 2H,  $\text{H}_g'$ , 11.7, 0.025). Isomer **B**,  $\delta$  7.938 (d, 2H,  $\text{H}_a$ , 7.8, -0.549), 7.474 (t, 2H,  $\text{H}_b$ , 6.8, 0.265), 7.526 (t, 2H,  $\text{H}_c$ , 7.3, -0.161), 9.219 (d, 2H,  $\text{H}_d$ , 4.9, 1.918), 2.169 (t, 2H,  $\text{H}_e$ , 12.7, -1.198), 3.482 (t, 2H,  $\text{H}_e'$ , 13.7, 0.115), 3.247 (d, 2H,  $\text{H}_f$ , 5.4, 0.273), 3.413 (t, 2H,  $\text{H}_f'$ , 13.2, 0.439), 1.811 (t, 2H,  $\text{H}_g$ , 9.5, -1.111), 2.947 (t, 2H,  $\text{H}_g'$ , 11.7, 0.025).

**[Ru(bbdo)Cl] $_2$ (ClO $_4$ ) $_2$  2** : Isomer **A**,  $\delta$  7.983 (d, 2H,  $\text{H}_a$ , 8.0, 0.511), 7.592 (t, 2H,  $\text{H}_b$ , 6.0, 0.477), 7.476 (t, 2H,  $\text{H}_c$ , 6.8, 0.361), 9.556 (d, 2H,  $\text{H}_d$ , 5.2, 2.084), 2.247 (t, 2H,  $\text{H}_e$ , 13.4, -0.839), 4.201 (t, 2H,  $\text{H}_e'$ , 14.0, 1.115), 3.272 (d, 2H,  $\text{H}_f$ , 5.2, 0.269), 3.408 (t, 2H,  $\text{H}_f'$ , 10.8, 0.405), 2.126 (t, 2H,  $\text{H}_g$ , 10.4, -0.623), 2.951 (t, 2H,  $\text{H}_g'$ , 13.6, 0.202). Isomer **A'**,  $\delta$  7.944 (d, 2H,  $\text{H}_a$ , 8.0, 0.472), 7.535 (t, 2H,  $\text{H}_b$ , 7.4, 0.420), 7.535 (t, 2H,  $\text{H}_c$ , 7.4, 0.420), 9.223 (d, 2H,  $\text{H}_d$ , 5.2, 1.751), 2.182 (t, 2H,  $\text{H}_e$ , 12.2, -0.904), 3.470 (t, 2H,  $\text{H}_e'$ , 13.9, 0.419), 3.237 (d, 2H,  $\text{H}_f$ , 4.8, 0.234), 3.408 (t, 2H,  $\text{H}_f'$ , 10.8, 0.405), 1.820 (t, 2H,  $\text{H}_g$ , 14.0, -0.929), 2.951 (t, 2H,  $\text{H}_g'$ , 13.6, 0.202). Isomer **B**,  $\delta$  7.236 (d, 2H,  $\text{H}_a$ , 7.6, -0.236), 7.535 (t, 2H,  $\text{H}_b$ , 7.4, 0.420), 6.773 (t, 2H,  $\text{H}_c$ , 6.4, -0.342), 8.915 (d, 2H,  $\text{H}_d$ , 5.2, 1.443), 1.724 (t, 2H,  $\text{H}_e$ , 12.8, -1.362), 3.441 (t, 2H,  $\text{H}_e'$ , 11.0, 0.419), 3.068 (d, 2H,  $\text{H}_f$ , 4.4, 0.065), 3.097 (d, 2H,  $\text{H}_f'$ , 4.0, 0.094), 1.411 (d, 2H,  $\text{H}_g$ , 9.6, -1.338), 2.612 (d, 2H,  $\text{H}_g'$ , 9.6, -0.137).

**[Ru(pdto)(bpy)](ClO $_4$ ) $_2$  3** :  $\delta$  7.349 (d, 2H,  $\text{H}_a$ , 7.8, -1.138), 7.227 (t, 2H,  $\text{H}_b$ , 6.4, 0.018), 8.031 (t, 2H,  $\text{H}_c$ , 6.4, 0.326), 8.609 (d, 2H,  $\text{H}_d$ , 6.4, 1.308), 2.382 (t, 2H,  $\text{H}_e$ , 12.7, -0.985), 3.662 (d, 2H,  $\text{H}_e'$ , 9.8, 0.295), 3.237 (d, 2H,  $\text{H}_f$ , 10.8, 0.263), 3.377 (d, 2H,  $\text{H}_f'$ , 16.6,

0.403), 2.247 (d, 2H, H<sub>g</sub>, 9.8, -0.675), 3.188 (d, 2H, H<sub>g'</sub>, 8.3, 0.266), 10.058 (d, 2H, H<sub>3</sub>, 4.9, 1.558), 8.286 (t, 2H, H<sub>4</sub>, 7.8, 0.290), 7.736 (t, 2H, H<sub>5</sub>, 7.6, 0.239), 8.609 (d, 2H, H<sub>6</sub>, 6.4, -0.162).

**[Ru(bbdo)(bpy)](ClO<sub>4</sub>)<sub>2</sub> 4** :  $\delta$  5.620 (d, 2H, H<sub>a</sub>, 8.3, -1.852), 5.754 (t, 2H, H<sub>b</sub>, 7.8, -1.361), 6.044 (t, 2H, H<sub>c</sub>, 8.1, -1.071), 7.417 (d, 2H, H<sub>d</sub>, 7.8, -0.055), 1.466 (d, 2H, H<sub>e</sub>, 10.7, -1.620), 2.525 (t, 2H, H<sub>e'</sub>, 6.9, -0.561), 2.184 (d, 2H, H<sub>f</sub>, 9.3, -0.819), 2.212 (t, 2H, H<sub>f'</sub>, 6.4, -0.791), 1.449 (d, 2H, H<sub>g</sub>, 10.7, -1.300), 1.784 (t, 2H, H<sub>g'</sub>, 9.3, -0.965), 12.167 (br, 2H, NH<sub>bzim</sub>), 8.853 (d, 2H, H<sub>3</sub>, 5.4, 0.353), 7.105 (t, 2H, H<sub>4</sub>, 7.3, -0.891), 6.695 (t, 2H, H<sub>5</sub>, 6.1, -0.802), 6.335 (d, 2H, H<sub>6</sub>, 7.8, -2.436).

**[Ru(pdto)(dpa)](ClO<sub>4</sub>)<sub>2</sub> 5** :  $\delta$  7.364 (d, 2H, H<sub>a</sub>, 7.1, -1.123), 7.091 (t, 2H, H<sub>b</sub>, 6.2, -0.118), 7.822 (t, 2H, H<sub>c</sub>, 6.7, 0.135), 7.841 (d, 2H, H<sub>d</sub>, 6.3, 0.540), 3.510 (t, 2H, H<sub>e</sub>, 8.4, 0.143), 3.510 (t, 2H, H<sub>e'</sub>, 8.4, 0.143), 3.225 (t, 2H, H<sub>f</sub>, 6.8, 0.251), 3.225 (t, 2H, H<sub>f'</sub>, 6.8, 0.251), 2.816 (t, 2H, H<sub>g</sub>, 8.3, -0.106), 2.816 (t, 2H, H<sub>g'</sub>, 8.3, -0.106), 8.040 (d, 2H, H<sub>3</sub>, 6.8, 0.303), 7.796 (t, 2H, H<sub>4</sub>, 7.0, 0.160), 7.091 (t, 2H, H<sub>5</sub>, 6.4, -0.406), 7.364 (d, 2H, H<sub>6</sub>, 5.8, -1.407), 10.921 (s, 1H, NH<sub>dpa</sub>, 1.289).

**[Ru(bbdo)(dpa)](ClO<sub>4</sub>)<sub>2</sub> 6** :  $\delta$  6.583 (d, 2H, H<sub>a</sub>, 8.1, -0.889), 6.823 (t, 2H, H<sub>b</sub>, 7.1, -0.292), 7.803 (t, 2H, H<sub>c</sub>, 7.3, 0.688), 8.393 (d, 2H, H<sub>d</sub>, 7.1, 0.921), 3.592 (t, 2H, H<sub>e</sub>, 8.2, 0.506), 3.592 (t, 2H, H<sub>e'</sub>, 8.2, 0.506), 3.102 (t, 2H, H<sub>f</sub>, 6.9, 0.099), 3.102 (t, 2H, H<sub>f'</sub>, 6.9, 0.099), 2.612 (t, 2H, H<sub>g</sub>, 8.4, -0.137), 2.612 (t, 2H, H<sub>g'</sub>, 8.4, -0.137), 11.992 (br, 2H, NH<sub>bzim</sub>), 8.866 (d, 2H, H<sub>3</sub>, 6.9, 1.129), 8.102 (t, 2H, H<sub>4</sub>, 7.2, 0.466), 7.139 (t, 2H, H<sub>5</sub>, 6.2, -0.358), 7.517 (d, 2H, H<sub>6</sub>, 6.6, -1.254), 10.720 (s, 1H, NH<sub>dpa</sub>, 1.088).

**[Ru(pdto)(terpy)](ClO<sub>4</sub>)<sub>2</sub> 7** :  $\delta$  7.351 (d, 2H, H<sub>a</sub>, 7.9, -1.136), 7.324 (t, 2H, H<sub>b</sub>, 7.6, 0.115), 7.785 (t, 2H, H<sub>c</sub>, 7.2, 0.098), 8.659 (d, 2H, H<sub>d</sub>, 4.9, 1.358), 1.901 (t, 2H, H<sub>e</sub>, 12.3, -1.466), 3.300 (t, 2H, H<sub>e'</sub>, 8.1, -0.067), 2.929 (d, 2H, H<sub>f</sub>, 9.7, -0.045), 3.101 (t, 2H, H<sub>f'</sub>, 13.7, 0.127), 1.818 (d, 2H, H<sub>g</sub>, 9.5, -1.104), 2.222 (d, 2H, H<sub>g'</sub>, 9.6, -0.700), 10.677 (s, 2H, H<sub>3</sub>, 2.233), 7.785 (t, 2H, H<sub>4</sub>, 7.2, -0.223), 7.477 (t, 2H, H<sub>5</sub>, 7.6, -0.016), 8.659 (d, 2H, H<sub>6</sub>, 4.9, -0.066), 10.677 (s, 2H, H<sub>3'</sub>, 2.041), 10.166 (s, 1H, H<sub>4'</sub>, 2.069).

**[Ru(bbdo)(terpy)](ClO<sub>4</sub>)<sub>2</sub> 8** :  $\delta$  7.184 (d, 2H, H<sub>a</sub>, 6.2, -0.288), 7.075 (t, 2H, H<sub>b</sub>, 4.8, -0.040), 7.470 (t, 2H, H<sub>c</sub>, 6.2, 0.355), 8.445 (d, 2H, H<sub>d</sub>, 7.7, 0.973), 1.590 (t, 2H, H<sub>e</sub>, 12.2, -1.496), 3.205 (t, 2H, H<sub>e'</sub>, 8.6, -0.119), 2.800 (d, 2H, H<sub>f</sub>, 9.2, -0.203), 2.198 (d, 2H, H<sub>f'</sub>, 12.8, -0.085), 1.343 (d, 2H, H<sub>g</sub>, 8.0, -1.406), 2.386 (d, 2H, H<sub>g'</sub>, 8.1, -0.363), 11.752 (br, 2H, NH<sub>bzim</sub>), 8.634 (d, 2H, H<sub>3</sub>, 6.6, 0.190), 8.056 (t, 2H, H<sub>4</sub>, 7.1, 0.051), 7.470 (t, 2H, H<sub>5</sub>, 6.2, -0.027), 8.412 (d, 2H, H<sub>6</sub>, 8.2, -0.313), 8.724 (s, 2H, H<sub>3'</sub>, 0.088), 8.113 (t, 1H, H<sub>4'</sub>, 7.6, 0.016).

### <sup>13</sup>C NMR data

**Free ligands** :  $\delta$  (assignment)

**pdto** :  $\delta$  159.56 (C<sub>a</sub>\*), 148.92 (C<sub>a</sub>), 123.03 (C<sub>b</sub>), 136.29 (C<sub>c</sub>), 121.43 (C<sub>d</sub>), 37.61 (C<sub>e</sub>), 31.22 (C<sub>f</sub>), 30.50 (C<sub>g</sub>).

**bbdo** :  $\delta$  157.73 (C<sub>c</sub>\*), 142.90 (C<sub>b</sub>\* and C<sub>a</sub>\*), 118.79 (C<sub>a</sub> and C<sub>d</sub>), 125.58 (C<sub>b</sub> and C<sub>c</sub>), 35.44 (C<sub>e</sub>), 33.73 (C<sub>f</sub>), 33.44 (C<sub>g</sub>).

**bpy** :  $\delta$  155.36 (C<sub>2</sub>), 120.52 (C<sub>3</sub>), 124.15 (C<sub>4</sub>), 137.23 (C<sub>5</sub>), 149.29 (C<sub>6</sub>).

**Ruthenium(II) complexes** :  $\delta$  (assignment, coordination-induced shifts: c.i.s.,  $\delta_{\text{complex}} - \delta_{\text{ligand}}$ )

**[Ru(pdto)Cl]<sub>2</sub>(ClO<sub>4</sub>)<sub>2</sub> 1** : Isomer **A**,  $\delta$  165.53 (C<sub>a</sub>\*, 5.97), 138.88 (C<sub>a</sub>, -10.04), 123.85 (C<sub>b</sub>, 0.82), 127.61 (C<sub>c</sub>, -8.68), 157.67 (C<sub>d</sub>, 36.24), 34.45 (C<sub>e</sub>, -3.16), 33.70 (C<sub>f</sub>, 2.48), 26.52 (C<sub>g</sub>, -3.98). Isomer **B**,  $\delta$  163.68 (C<sub>a</sub>\*, 4.12), 138.77 (C<sub>a</sub>, -10.15), 123.44 (C<sub>b</sub>, 0.41), 127.05 (C<sub>c</sub>, -9.24), 156.96 (C<sub>d</sub>, 35.53), 34.23 (C<sub>e</sub>, -3.38), 31.93 (C<sub>f</sub>, 0.71), 24.88 (C<sub>g</sub>, -5.62).

**[Ru(bbdo)Cl]<sub>2</sub>(ClO<sub>4</sub>)<sub>2</sub> 2** : Isomer **A**,  $\delta$  134.16 (C<sub>a</sub>\*, -8.74), 142.18 (C<sub>b</sub>\*, -0.72), 154.77 (C<sub>c</sub>\*, -2.96), 121.91 (C<sub>a</sub>, 3.12), 112.10 (C<sub>b</sub>, -13.48), 119.70 (C<sub>c</sub>, -5.88), 126.21 (C<sub>d</sub>, 7.42), 32.28 (C<sub>e</sub>, -3.16), 27.02 (C<sub>f</sub>, -6.71), 24.01 (C<sub>g</sub>, -9.43). Isomer **A'**,  $\delta$  132.32 (C<sub>a</sub>\*, -10.58), 139.01 (C<sub>b</sub>\*, -3.89), 152.28 (C<sub>c</sub>\*, -5.45), 120.68 (C<sub>a</sub>, 1.89), 110.23 (C<sub>b</sub>, -15.35), 117.31 (C<sub>c</sub>, -8.27), 124.11 (C<sub>d</sub>, 5.32), 30.12 (C<sub>e</sub>, -5.32), 26.48 (C<sub>f</sub>, -7.25), 22.63 (C<sub>g</sub>, -10.81). Isomer **B**,  $\delta$  130.21 (C<sub>a</sub>\*, -12.69), 137.89 (C<sub>b</sub>\*, -5.01), 150.85 (C<sub>c</sub>\*, -6.88), 120.09 (C<sub>a</sub>, 1.30), 108.14 (C<sub>b</sub>, -17.44), 115.28 (C<sub>c</sub>, -10.30), 122.43 (C<sub>d</sub>, 3.64), 28.29 (C<sub>e</sub>, -7.15), 24.68 (C<sub>f</sub>, -9.05), 21.09 (C<sub>g</sub>, -12.35).

**[Ru(pdto)(bpy)](ClO<sub>4</sub>)<sub>2</sub> 3** :  $\delta$  163.62 (C<sub>a</sub>\*, 4.07), 124.06 (C<sub>a</sub>, -24.86), 123.60 (C<sub>b</sub>, 0.57), 128.45 (C<sub>c</sub>, -5.42), 153.11 (C<sub>d</sub>, 31.68), 33.88 (C<sub>e</sub>, -3.93), 31.68 (C<sub>f</sub>, 0.46), 26.08 (C<sub>g</sub>, -4.42), 163.62 (C<sub>2</sub>, 8.26), 156.94 (C<sub>3</sub>, 36.42), 138.40 (C<sub>4</sub>, 14.25), 127.35 (C<sub>5</sub>, -9.88), 139.42 (C<sub>6</sub>, -9.87).

**[Ru(bbdo)(bpy)](ClO<sub>4</sub>)<sub>2</sub> 4** :  $\delta$  132.45 (C<sub>a</sub>\*, -10.45), 143.03 (C<sub>b</sub>\*, 0.13), 154.52 (C<sub>c</sub>\*, -3.21), 112.34 (C<sub>a</sub>, -6.45), 115.91 (C<sub>b</sub>, -9.67), 121.95 (C<sub>c</sub>, -3.63), 138.90 (C<sub>d</sub>, 20.11), 35.50 (C<sub>e</sub>, 0.06), 27.40 (C<sub>f</sub>, -6.33), 25.96 (C<sub>g</sub>, -7.48), 154.52 (C<sub>2</sub>, -0.84), 157.60 (C<sub>3</sub>, 37.08), 126.61 (C<sub>4</sub>, 2.46), 124.01 (C<sub>5</sub>, -13.22), 123.13 (C<sub>6</sub>, -26.16).

---

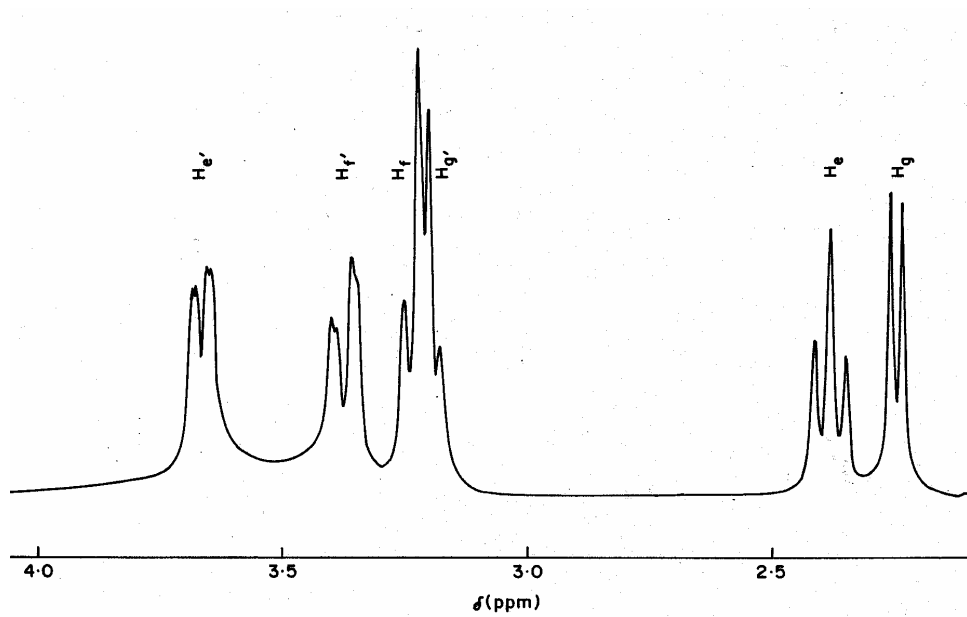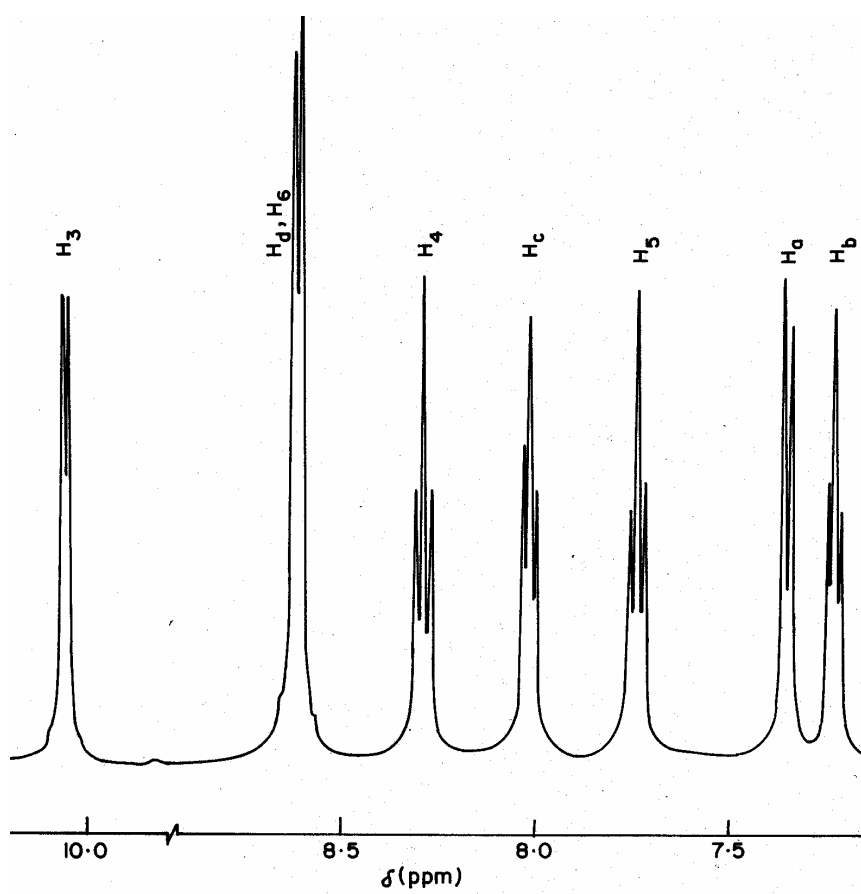

**Fig. S1.**  $^1\text{H}$  NMR spectrum of  $[\text{Ru}(\text{pdto})(\text{bipy})](\text{ClO}_4)_2$  **3** in  $(\text{CD}_3)_2\text{SO}$ .

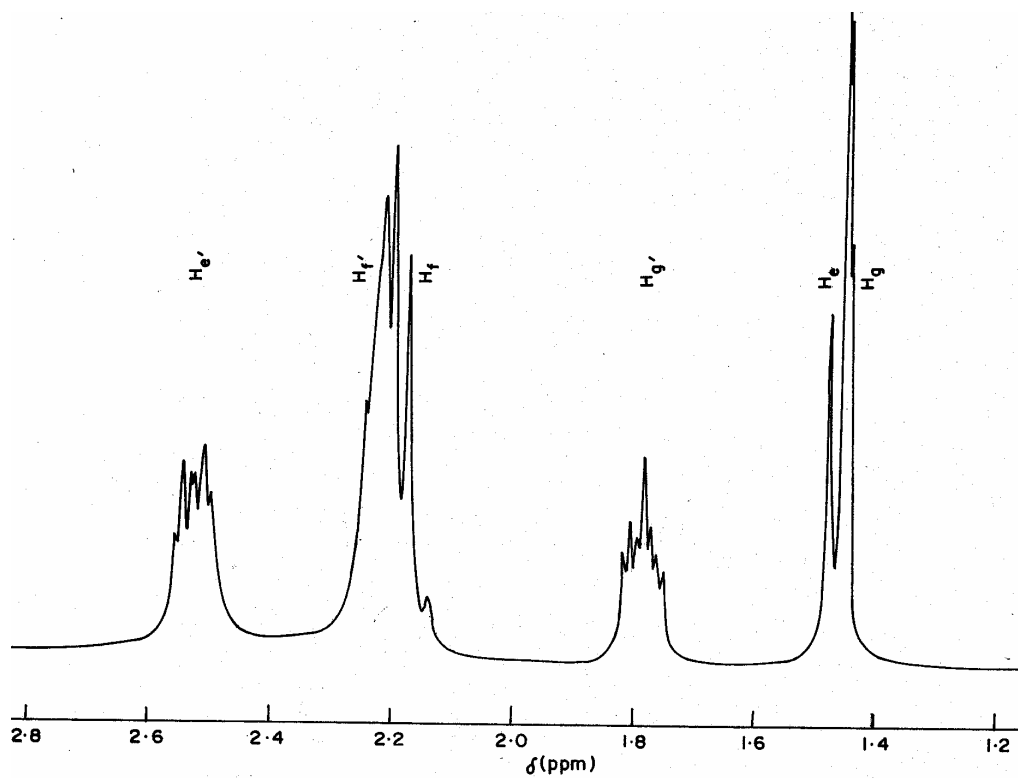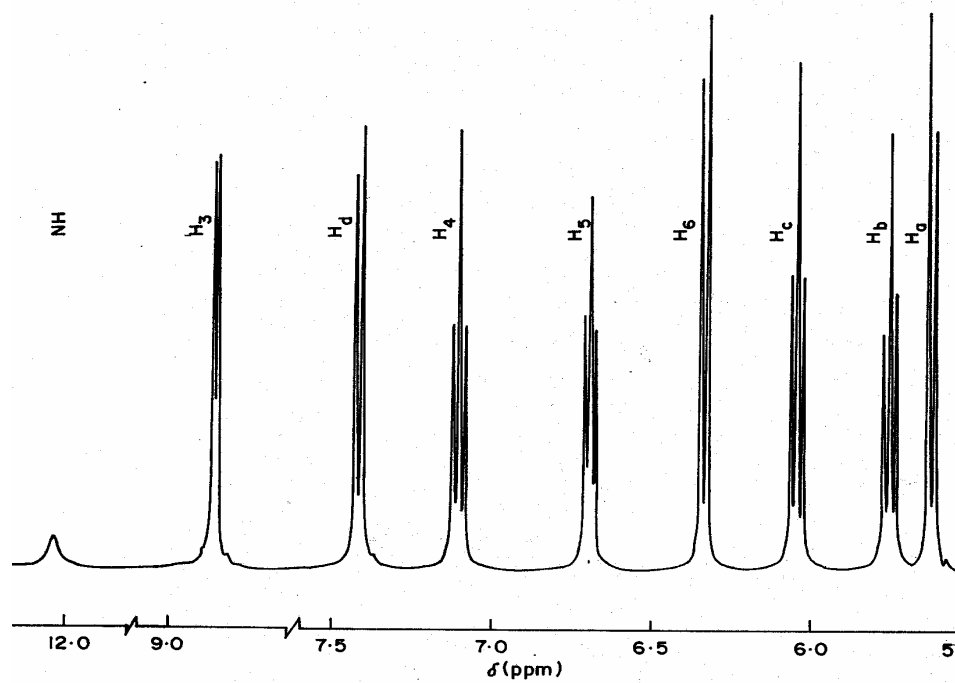

Fig. S2.  $^1\text{H}$  NMR spectrum of  $[\text{Ru}(\text{bbdo})(\text{bipy})](\text{ClO}_4)_2$  **4** in  $(\text{CD}_3)_2\text{SO}$ .

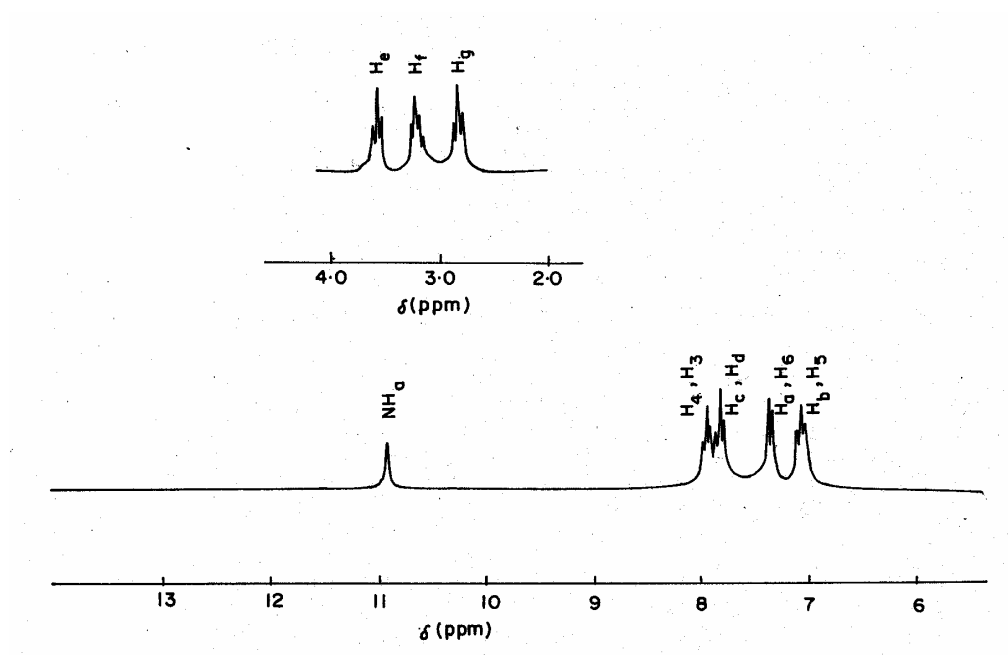

**Fig. S3.**  $^1\text{H}$  NMR spectrum of  $[\text{Ru}(\text{pdto})(\text{dpa})](\text{ClO}_4)_2$  **5** in  $(\text{CD}_3)_2\text{SO}$ .

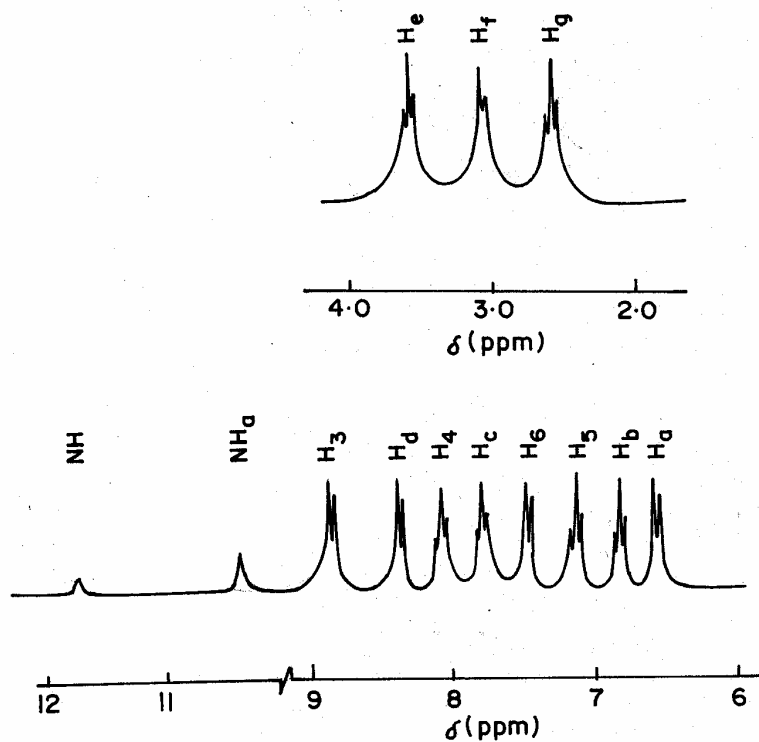

**Fig. S4.** <sup>1</sup>H NMR spectrum of [Ru(bbdo)(dpa)](ClO<sub>4</sub>)<sub>2</sub> **6** in (CD<sub>3</sub>)<sub>2</sub>SO.

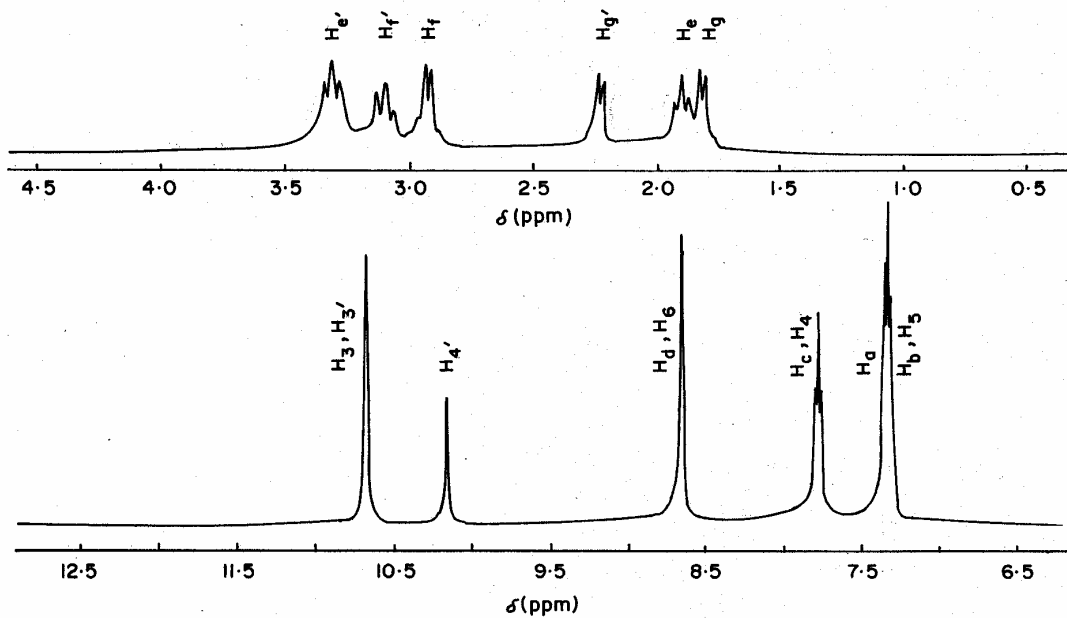

**Fig. S5.**  $^1\text{H}$  NMR spectrum of  $[\text{Ru}(\text{pdto})(\text{terpy})](\text{ClO}_4)_2$  7 in  $(\text{CD}_3)_2\text{SO}$ .



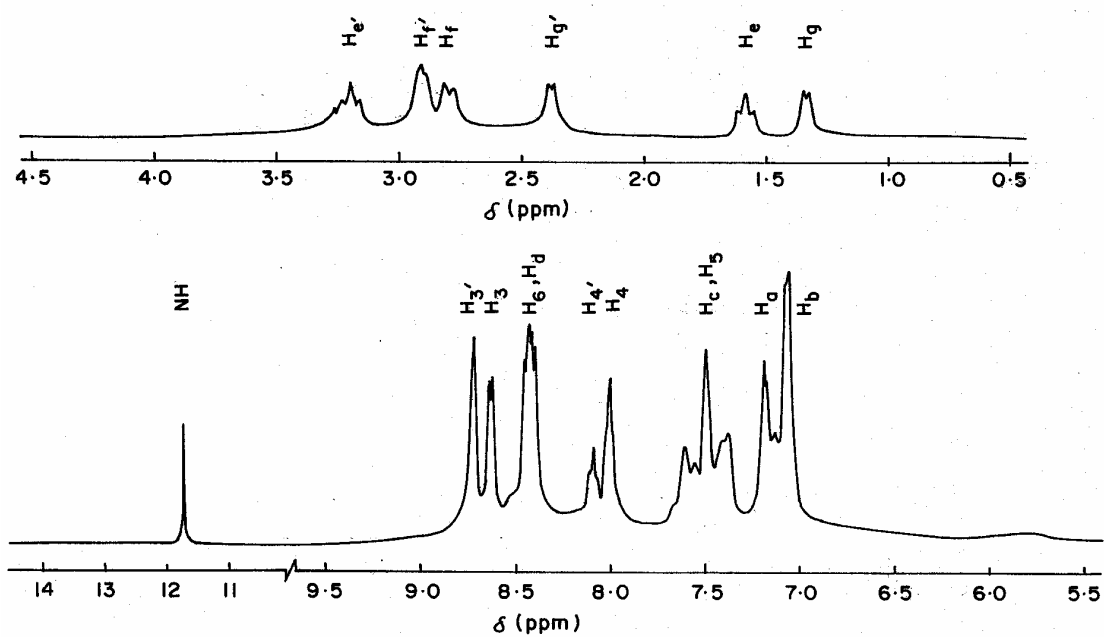

**Fig. S6.**  $^1\text{H}$  NMR spectrum of  $[\text{Ru}(\text{bbdo})(\text{terpy})](\text{ClO}_4)_2$  **8** in  $(\text{CD}_3)_2\text{SO}$ .

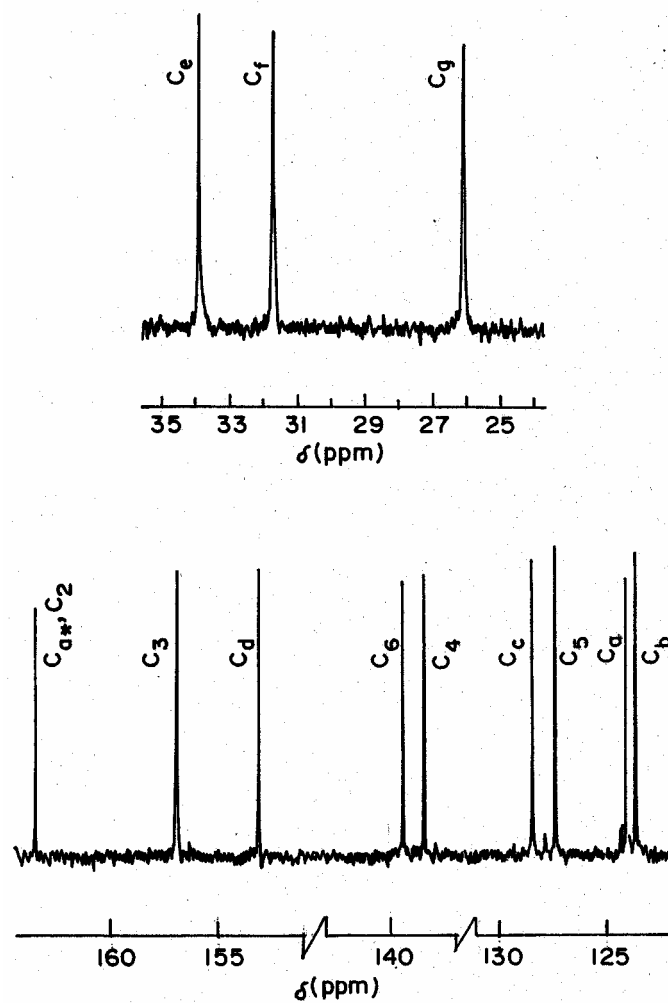

Fig. S7.  $^{13}\text{C}$  NMR spectrum of  $[\text{Ru}(\text{pdto})(\text{bipy})](\text{ClO}_4)_2 \mathbf{3}$  in  $(\text{CD}_3)_2\text{SO}$ .

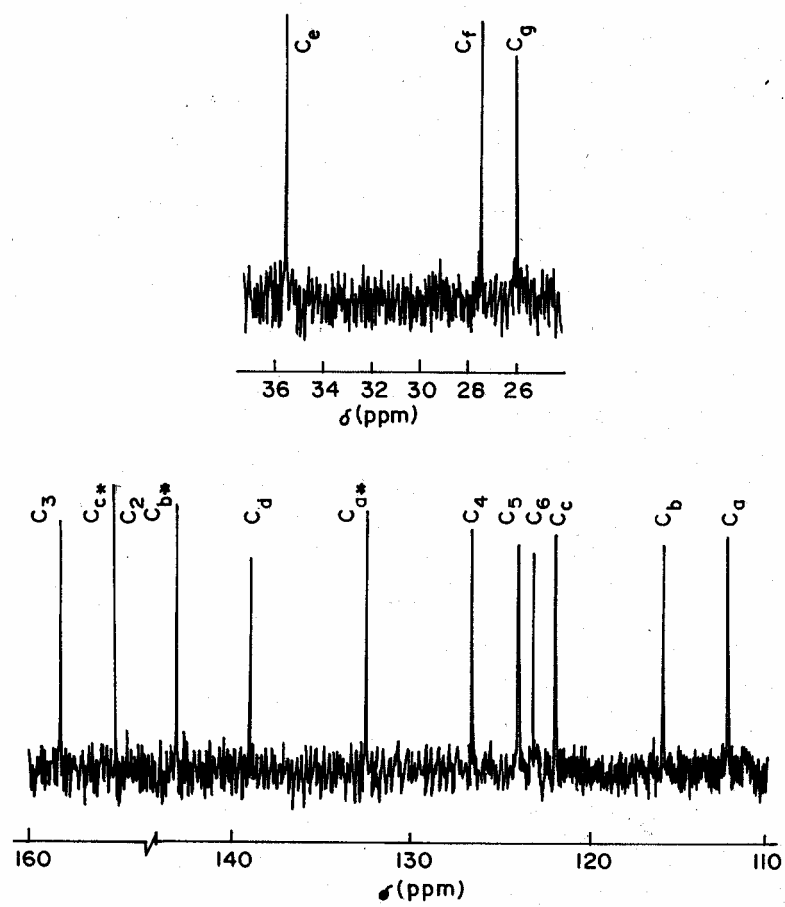

**Fig. S8.**  $^{13}\text{C}$  NMR spectrum of  $[\text{Ru}(\text{bbdo})(\text{bipy})](\text{ClO}_4)_2$  **4** in  $(\text{CD}_3)_2\text{SO}$ .

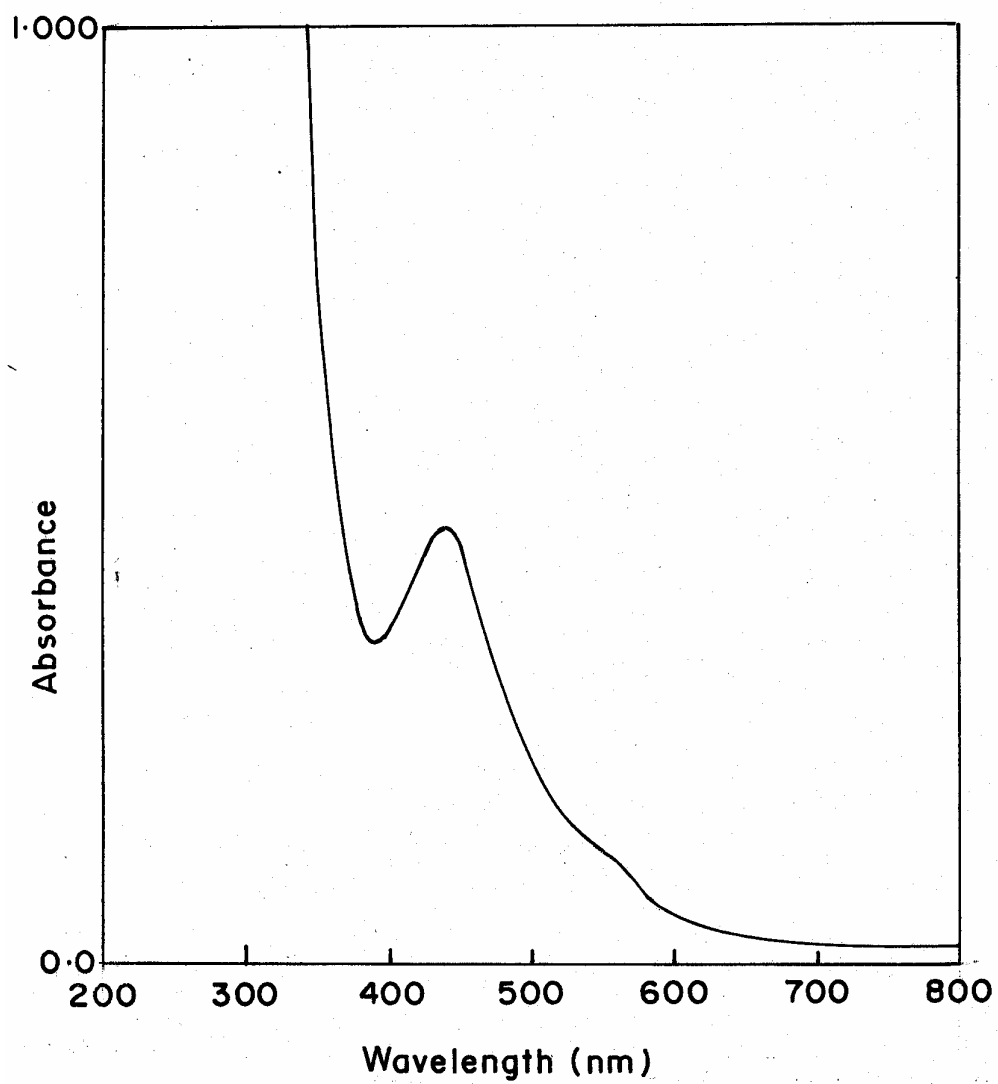

**Fig. S9.** Electronic spectrum of the complex [Ru(bbdo)(terpy)](ClO<sub>4</sub>)<sub>2</sub> **8** in acetonitrile solution.

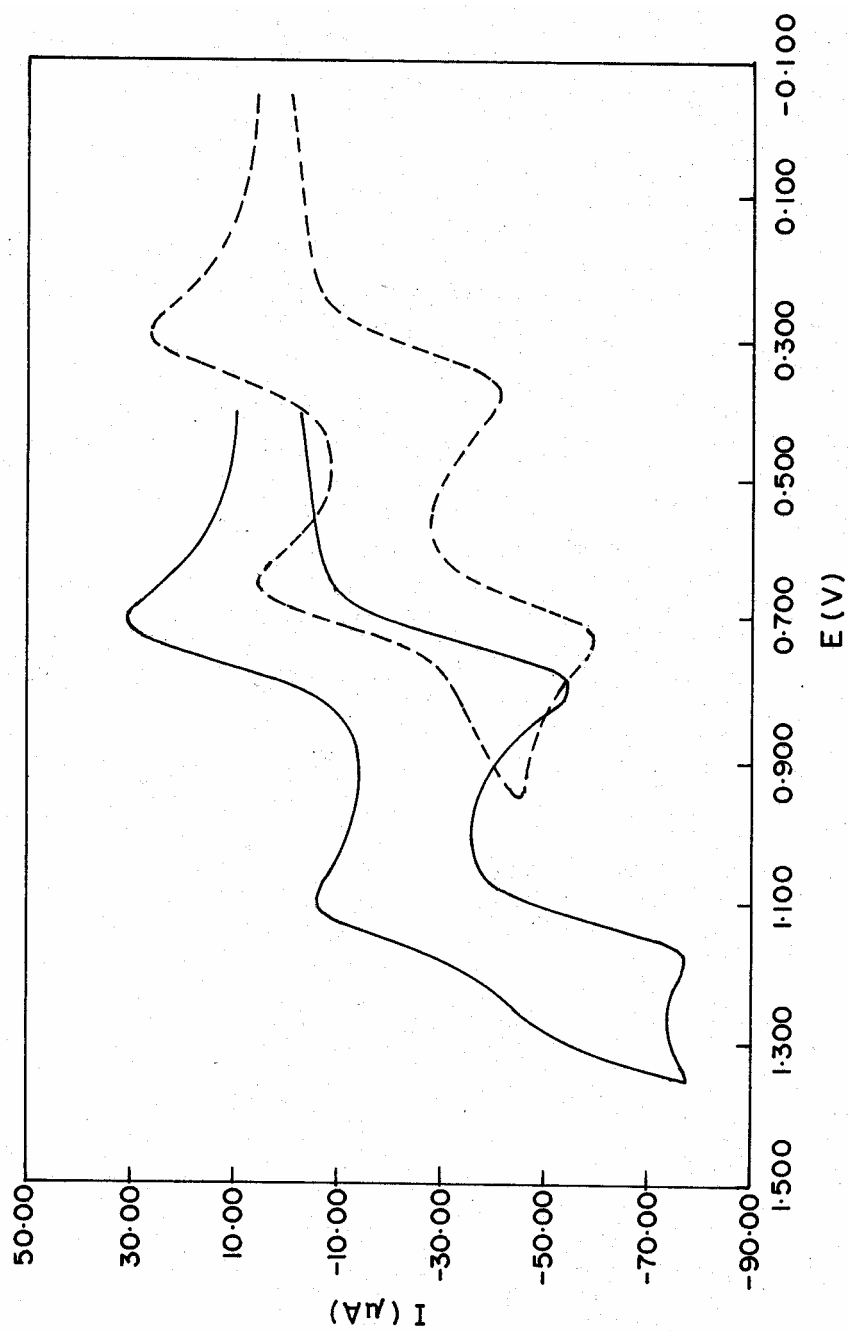

**Fig. S10.** Cyclic voltammograms of 0.001 M complexes [Ru(pdto)(μ-Cl)<sub>2</sub>(ClO<sub>4</sub>)<sub>2</sub> **1** (—) and [Ru(bbdo)(μ-Cl)<sub>2</sub>(ClO<sub>4</sub>)<sub>2</sub> **2** (----) in CH<sub>3</sub>CN at 25 °C at 0.05 Vs<sup>-1</sup> scan rate.

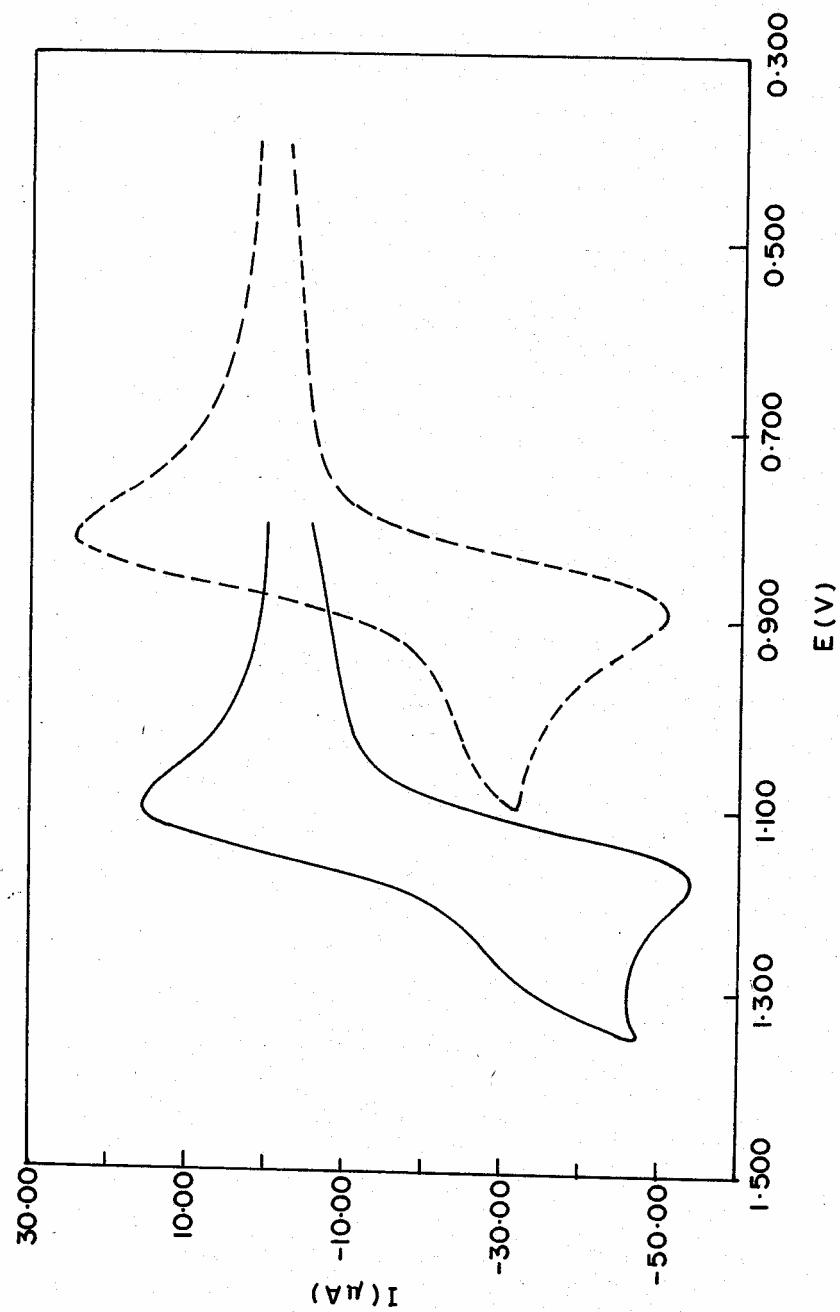

**Fig. S11.** Cyclic voltammograms of 0.001 M complexes  $[\text{Ru}(\text{pdto})(\text{bipy})](\text{ClO}_4)_2$  **3** (—) and  $[\text{Ru}(\text{bbdo})(\text{bipy})](\text{ClO}_4)_2$  **4** (----) in  $\text{CH}_3\text{CN}$  at 25 °C at 0.05  $\text{Vs}^{-1}$  scan rate.

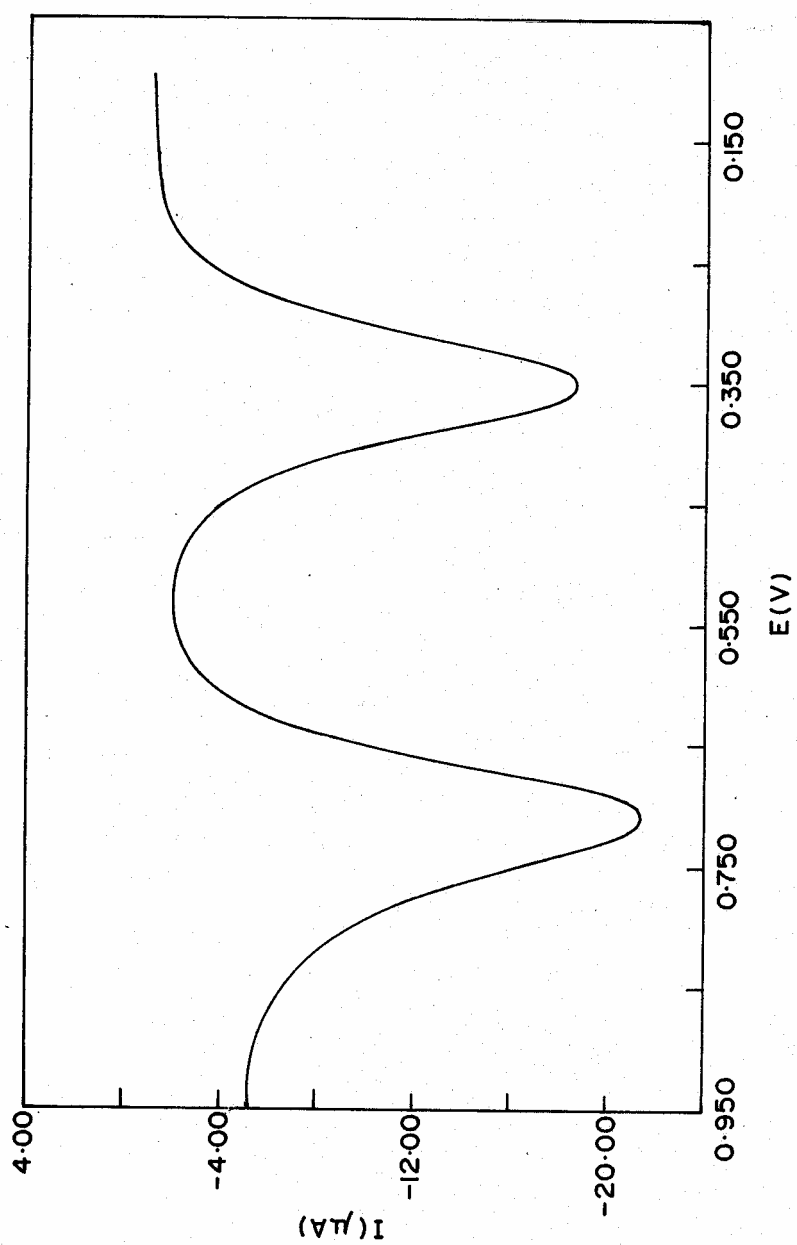

**Fig. S12.** Differential pulse voltammogram of 0.001 M complex  $[\text{Ru}(\text{bbdo})(\text{terpy})](\text{ClO}_4)_2$  **8** in  $\text{CH}_3\text{CN}$  at 25 °C at 0.05  $\text{Vs}^{-1}$  scan rate.
